# Supplementary material for: Diethyl(thiophen-2-ylmethyl)phosphonate: a novel multifunctional electrolyte additive for high voltage batteries
Source: Royal Society of Chemistry journal article supplement (doi:10.1039/c8ta01236a), 2018-01-01
Supplement: c8ta01236a1.pdf [file c8ta01236a1.pdf]

Supporting Information

# **Diethyl (thiophen-2-ylmethyl) phosphonate: A Novel Multifunctional Electrolyte Additive for High Voltage Batteries**

Yunmin Zhu<sup>a</sup>, Xueyi Luo<sup>a</sup>, Huozhen Zhi<sup>a</sup>, Youhao Liao<sup>a,b</sup>, Lidan Xing<sup>a,b</sup>,

Mengqing Xu<sup>a,b</sup>, Xiang Liu<sup>a,b</sup>, Kang Xu<sup>c,\*</sup>, and Weishan Li<sup>a, b,\*</sup>

*a. School of Chemistry and Environment, South China Normal University, Guangzhou 510006, China*

*b. Engineering Research Center of MTEES (Ministry of Education), Research Center of BMET (Guangdong Province), Engineering Lab. of OFMHEB (Guangdong Province), Key Lab. of ETESPG (GHEI), and Innovative Platform for ITBMD (Guangzhou Municipality), School of Chemistry and Environment, South China Normal University, Guangzhou 510006, China*

*c. Electrochemistry Branch, Sensor and Electron Devices Directorate, Power and Energy Division, U.S. Army Research Laboratory, Adelphi, MD 20783, USA.*

*\*Corresponding authors: k.xu.civ@mail.mil; liwsh@scnu.edu.cn*

## Captions:

Scheme S1. Synthesis path of diethyl (thiophen-2-ylmethyl) phosphonate (DTYP).

Figure S1.  $^1\text{H}$  NMR spectra of diethyl (thiophen-2-ylmethyl) phosphonate (DTYP) in TMS.

Table S1. Parameters from GC-MS of DTYP.

Figure S2. Rate capability of  $\text{LiNi}_{0.5}\text{Mn}_{1.5}\text{O}_4$  electrodes in base and DTYP-containing electrolytes under room temperature.

Figure S3. Cyclic stability (A) and Coulombic efficiency (B) of  $\text{LiNi}_{0.5}\text{Mn}_{1.5}\text{O}_4$  electrodes in the electrolytes containing various contents of DTYP under room temperature at 0.5 C for the first three cycles and at 1 C for the subsequent cycles between 3 V and 4.9 V, followed by a constant potential of 4.9 V until the current reaches 0.1 C.

Figure S4. Cyclic stability (A) of  $\text{LiNi}_{0.5}\text{Mn}_{1.5}\text{O}_4$ /graphite full cells with and without DTYP at 0.1 C for the activation and at 0.2 C for the follow cycles from 3.0~4.9 V, followed by a constant potential for current below 0.01 and 0.02 C; Charge/discharge profiles of the selected cycles in electrolytes without (B) and with (C) DTYP; (D) Mean charge/discharge voltages of the selected cycles in base and DTYP-containing electrolytes.

Figure S5. Cyclic stability and Coulombic efficiency of graphite electrodes in electrolytes with and without 0.5% DTYP under room temperature at 0.2 C between 0.005V and 2.5 V.

Figure S6. SEM images from different position angles under different resolutions from Fig. 2A for pristine (A) and the cycled  $\text{LiNi}_{0.5}\text{Mn}_{1.5}\text{O}_4$  electrodes in base (B) and DTYP-containing (C) electrolytes.

Table S2. Contents of Ni, Mn and Al that deposit on the lithium electrode after cycling in base and DTYP-containing electrolytes.

Figure S7. Photos of puncture experiments for pouch batteries with base and DTYP-containing electrolytes.

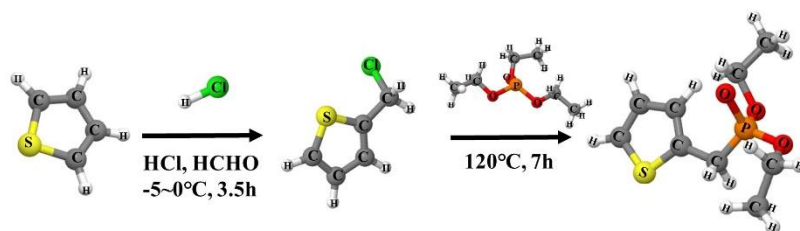

Scheme S1. Synthesis path of diethyl (thiophen-2-ylmethyl) phosphonate (DTYP).

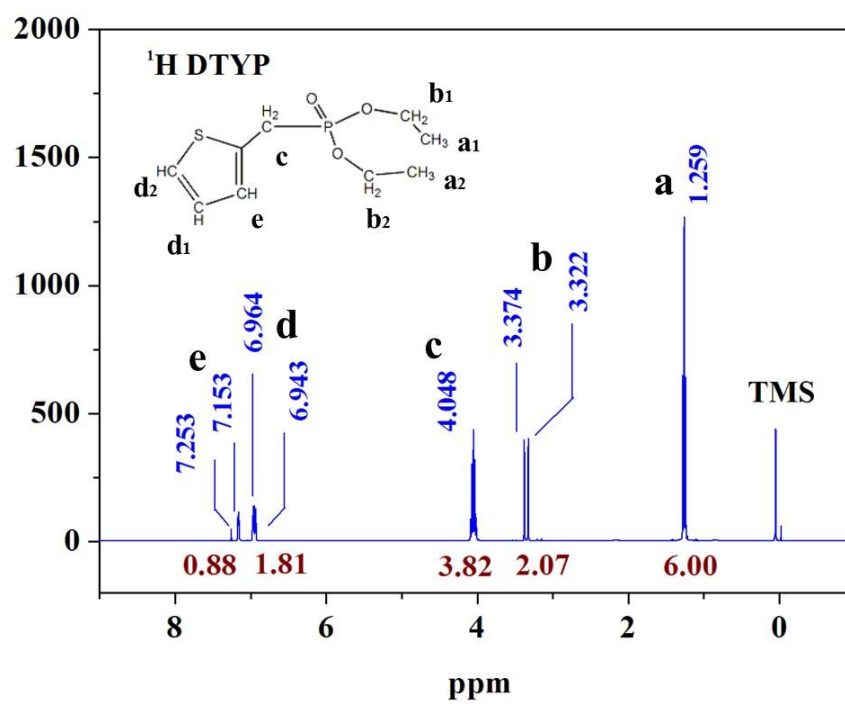

Figure S1. <sup>1</sup>H NMR spectra of diethyl (thiophen-2-ylmethyl) phosphonate (DTYP) in TMS.

Table S1. Parameters from GC-MS of DTYP.

| <b>Retention<br/>time</b> | <b>Peak area</b> | <b>Peak high</b> | <b>Concentration</b> |
|---------------------------|------------------|------------------|----------------------|
| <b>2.673</b>              | <b>13188</b>     | <b>7728</b>      | <b>0.039</b>         |
| <b>4.687</b>              | <b>2244</b>      | <b>1262</b>      | <b>0.007</b>         |
| <b>6.874</b>              | <b>16428</b>     | <b>7776</b>      | <b>0.048</b>         |
| <b>7.502</b>              | <b>2420</b>      | <b>1285</b>      | <b>0.007</b>         |
| <b>12.015</b>             | <b>46181</b>     | <b>24122</b>     | <b>0.136</b>         |
| <b>12.110</b>             | <b>7418</b>      | <b>3697</b>      | <b>0.022</b>         |
| <b>13.313</b>             | <b>33814308</b>  | <b>3144408</b>   | <b>99.254</b>        |
| <b>13.703</b>             | <b>101130</b>    | <b>43279</b>     | <b>0.297</b>         |
| <b>14.280</b>             | <b>12732</b>     | <b>6421</b>      | <b>0.037</b>         |
| <b>14.387</b>             | <b>17570</b>     | <b>8449</b>      | <b>0.052</b>         |
| <b>14.652</b>             | <b>22632</b>     | <b>10777</b>     | <b>0.066</b>         |
| <b>14.877</b>             | <b>3700</b>      | <b>1266</b>      | <b>0.011</b>         |
| <b>15.370</b>             | <b>5156</b>      | <b>2745</b>      | <b>0.015</b>         |
| <b>15.602</b>             | <b>3263</b>      | <b>1777</b>      | <b>0.010</b>         |

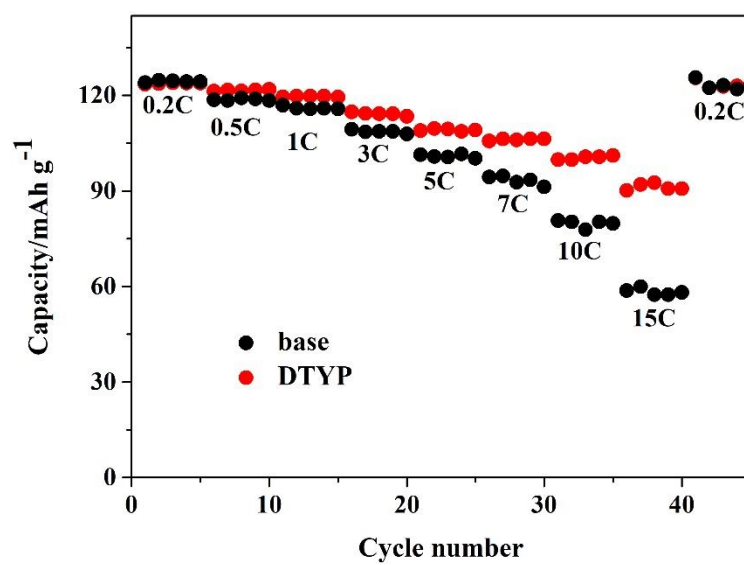

Figure S2. Rate capability of  $\text{LiNi}_{0.5}\text{Mn}_{1.5}\text{O}_4$  electrodes in base and DTYP-containing electrolytes under room temperature.

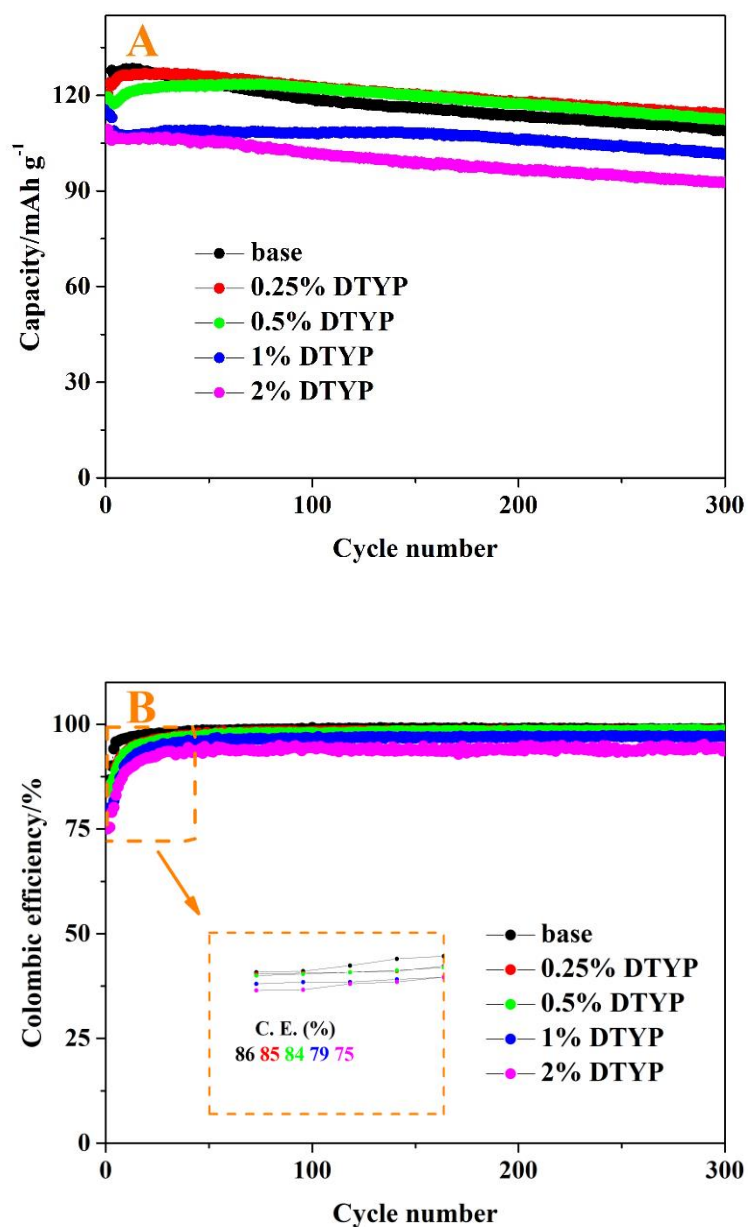

Figure S3. Cyclic stability (A) and Coulombic efficiency (B) of  $\text{LiNi}_{0.5}\text{Mn}_{1.5}\text{O}_4$  electrodes in the electrolytes containing various contents of DTYP under room temperature at 0.5 C for the first three cycles and at 1 C for the subsequent cycles between 3 V and 4.9 V, followed by a constant potential of 4.9 V until the current reaches 0.1 C.

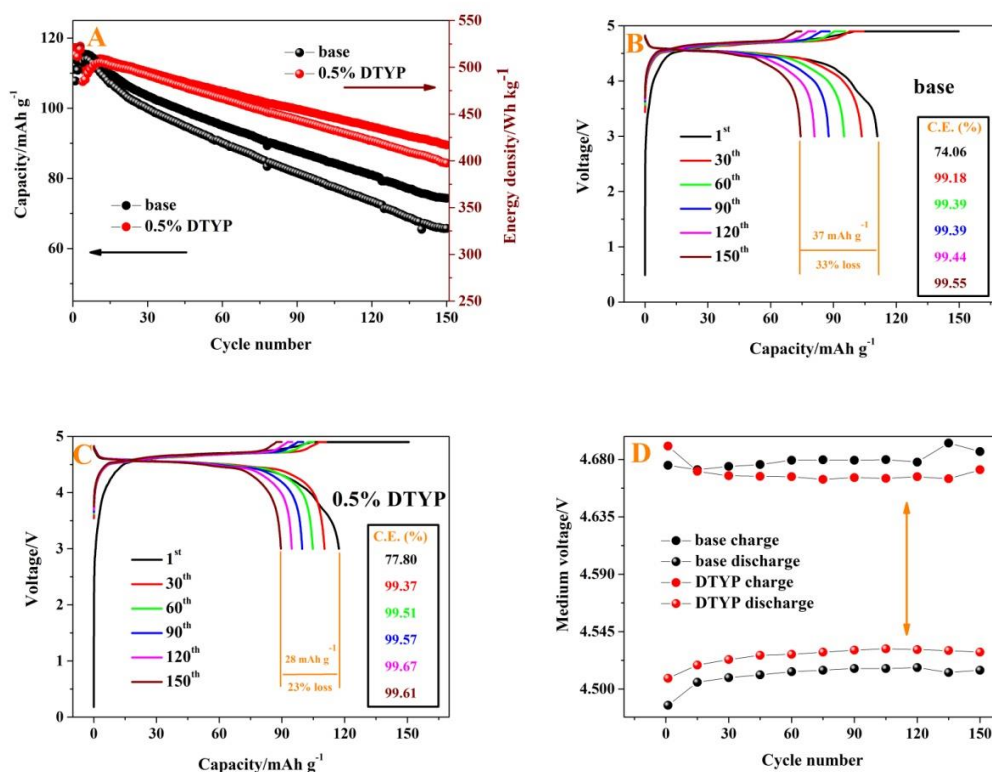

Figure S4. Cyclic stability (A) of LiNi<sub>0.5</sub>Mn<sub>1.5</sub>O<sub>4</sub>/graphite full cells with and without DTYP at 0.1 C for the activation and at 0.2 C for the follow cycles from 3.0~4.9 V, followed by a constant potential for current below 0.01 and 0.02 C; Charge/discharge profiles of the selected cycles in electrolytes without (B) and with (C) DTYP; (D) Mean charge/discharge voltages of the selected cycles in base and DTYP-containing electrolytes.

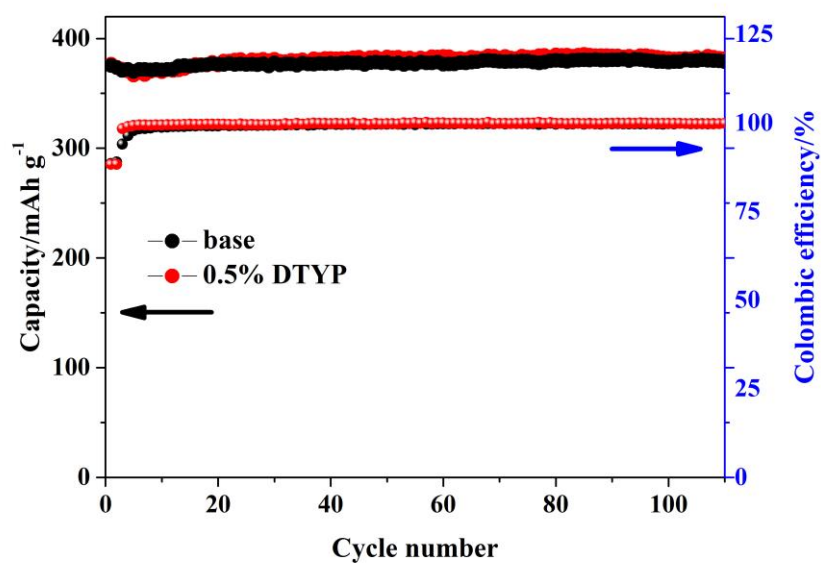

Figure S5. Cyclic stability and Coulombic efficiency of graphite electrodes in electrolytes with and without 0.5% DTYP under room temperature at 0.2 C between 0.005V and 2.5 V.

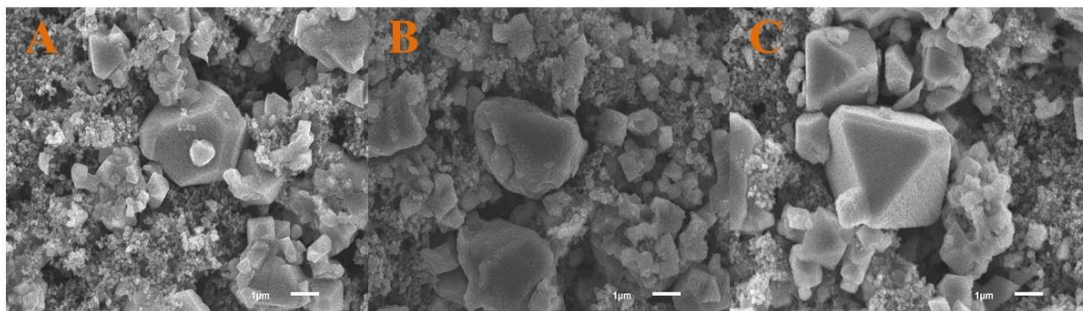

Figure S6. SEM images from different position angles under different resolutions from Figure 2A for pristine (A) and the cycled  $\text{LiNi}_{0.5}\text{Mn}_{1.5}\text{O}_4$  electrodes in base (B) and DTYP-containing (C) electrolytes.

Table S2. Contents of Ni, Mn and Al that deposit on the lithium electrode after cycling in base and DTYP-containing electrolytes.

|                        | Ni (mg L <sup>-1</sup> ) | Mn (mg L <sup>-1</sup> ) | Al (mg L <sup>-1</sup> ) |
|------------------------|--------------------------|--------------------------|--------------------------|
| <b>base</b>            | <b>2.18</b>              | <b>3.61</b>              | <b>0.57</b>              |
| <b>DTYP-containing</b> | <b>0.28</b>              | <b>0.46</b>              | <b>0.081</b>             |

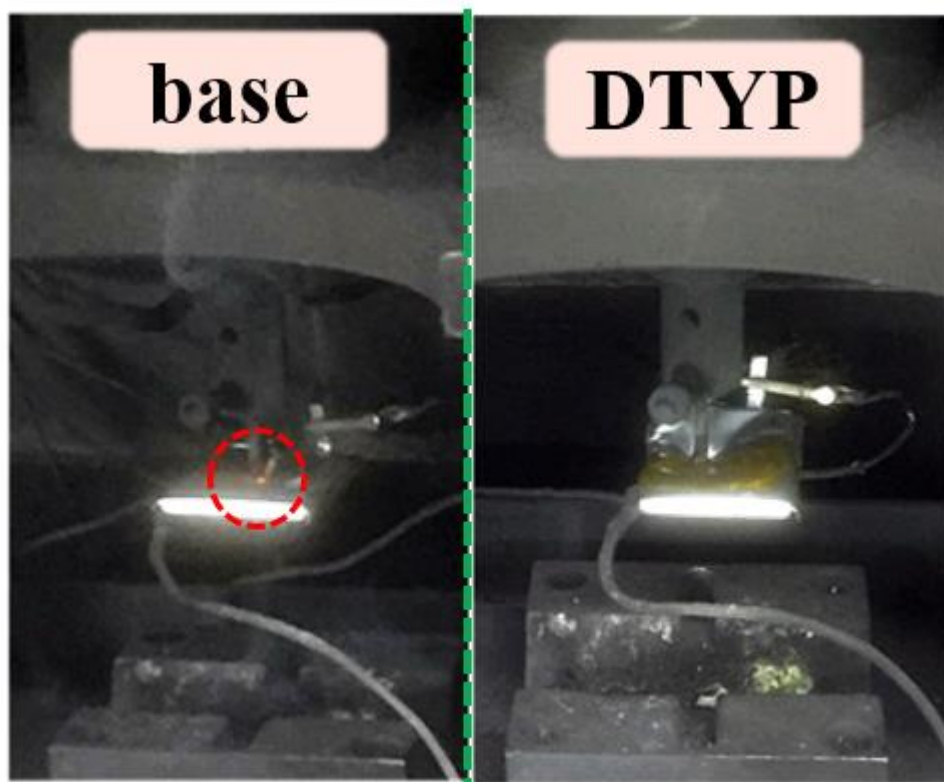

Figure S7. Photos of puncture experiments for pouch batteries with base and DTYP-containing electrolytes.
